# Supplementary material for: Dynamic pre-structuration of lipid nanodomain-segregating remorin proteins
Source: PubMed Central journal article supplement (PMC11621693; doi:10.1038/s42003-024-07330-y), 2024-12-05
Supplement: 42003_2024_7330_MOESM2_ESM.pdf [file 42003_2024_7330_MOESM2_ESM.pdf]

## Description of Additional Supplementary Files

**File name:** Supplementary Data 1

**Description:** primary sequences of remorin constructs used; detailed NMR restraint table; NMR restraints summary used for structure calculation

**File name:** Supplementary Data 2

**Description:** Dali predictions

**File name:** Supplementary Data 3

**Description:** Coconut predictions

**File name:** Supplementary Data 4

**Description:** The source data behind figures and graphs in the paper

**File name:** Supplementary Videos

**Description:** MD simulations using Amoeba FF
