# Supplementary material for: Dynamic pre-structuration of lipid nanodomain-segregating remorin proteins
Source: PubMed Central journal article supplement (PMC11621693; doi:10.1038/s42003-024-07330-y), 2024-12-05
Supplement: 42003_2024_7330_MOESM5_ESM.pdf [file 42003_2024_7330_MOESM5_ESM.pdf]

## AtREM1.1

**Oligomerization state:**  
Parallel dimer  
Antiparallel dimer  
Trimer  
Tetramer

**Registers:**  
a b c  
d e f  
g H

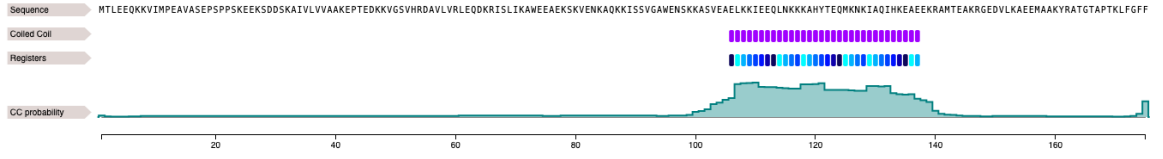

## AtREM1.2

**Oligomerization state:**  
Parallel dimer  
Antiparallel dimer  
Trimer  
Tetramer

**Registers:**  
a b c  
d e f  
g H

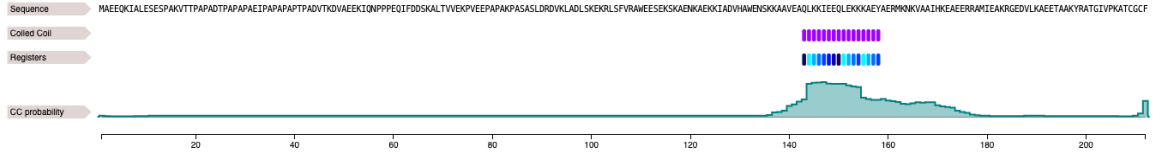

## AtREM1.3

**Oligomerization state:**  
Parallel dimer  
Antiparallel dimer  
Trimer  
Tetramer

**Registers:**  
a b c  
d e f  
g H

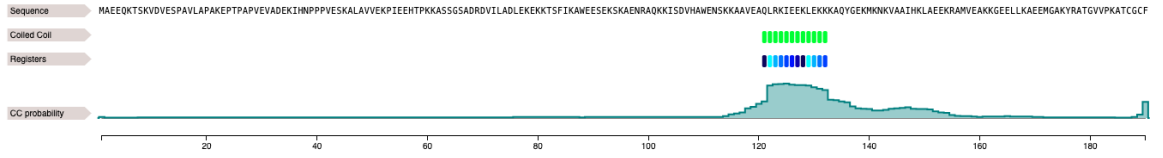

## AtREM1.4

**Oligomerization state:**  
Parallel dimer  
Antiparallel dimer  
Trimer  
Tetramer

**Registers:**  
a b c  
d e f  
g H

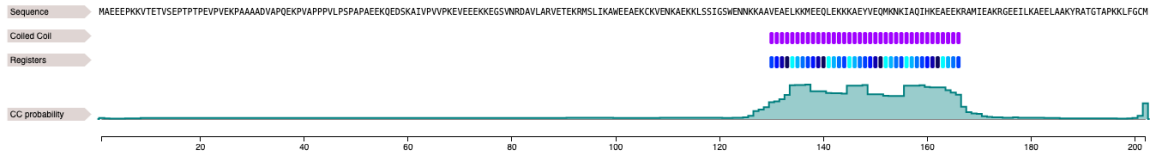

## AtREM1.5

**Oligomerization state:**  
Parallel dimer  
Antiparallel dimer  
Trimer  
Tetramer

**Registers:**  
a b c  
d e f  
g H

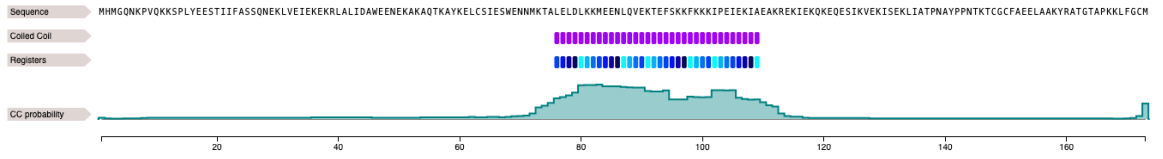

## AtREM3.1

**Oligomerization state:**  
Parallel dimer  
Antiparallel dimer  
Trimer  
Tetramer

**Registers:**  
a b c  
d e f  
g H

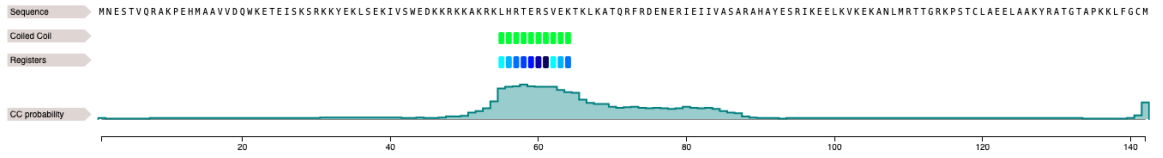

## AtREM3.2

**Oligomerization state:**

- Parallel dimer
- Antiparallel dimer
- Trimer
- Tetramer

**Registers:**

- a b c
- d e f
- g H

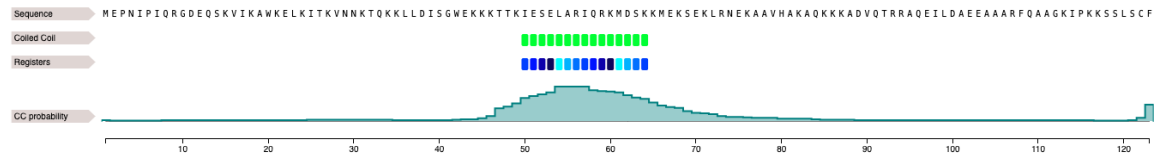

### AtREM4.1

**Oligomerization state:**

- Parallel dimer
- Antiparallel dimer
- Trimer
- Tetramer

**Registers:**

- a b c
- d e f
- g H

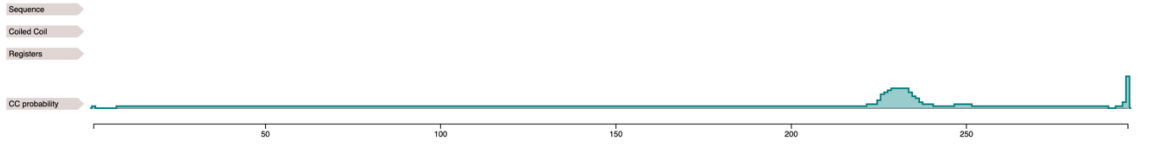

### AtREM4.1 Zoom

**Oligomerization state:**

- Parallel dimer
- Antiparallel dimer
- Trimer
- Tetramer

**Registers:**

- a b c
- d e f
- g H

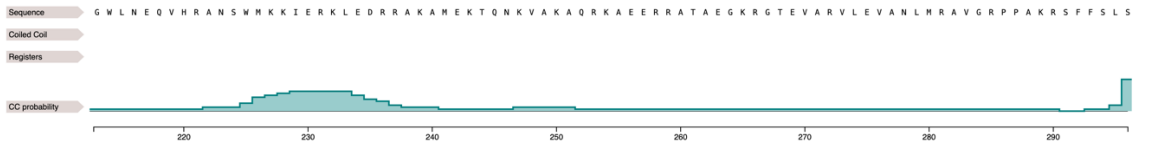

### AtREM4.2

**Oligomerization state:**

- Parallel dimer
- Antiparallel dimer
- Trimer
- Tetramer

**Registers:**

- a b c
- d e f
- g H

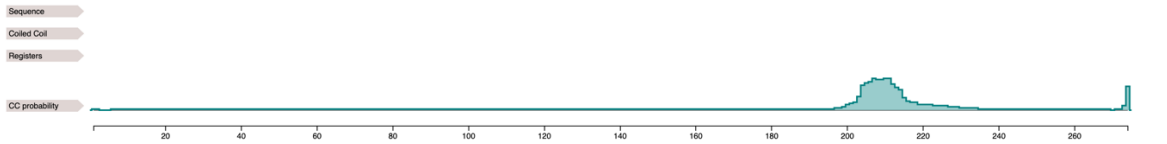

### AtREM4.2 Zoom

**Oligomerization state:**

- Parallel dimer
- Antiparallel dimer
- Trimer
- Tetramer

**Registers:**

- a b c
- d e f
- g H

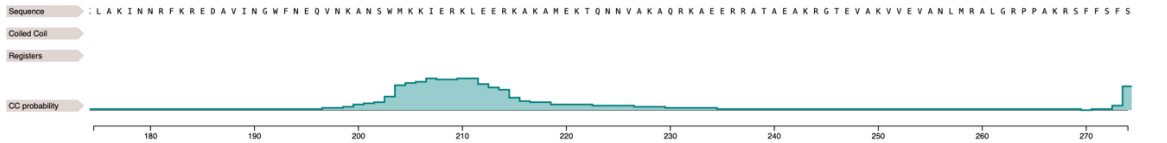

### AtREM5.1

**Oligomerization state:**

- Parallel dimer
- Antiparallel dimer
- Trimer
- Tetramer

**Registers:**

- a b c
- d e f
- g H

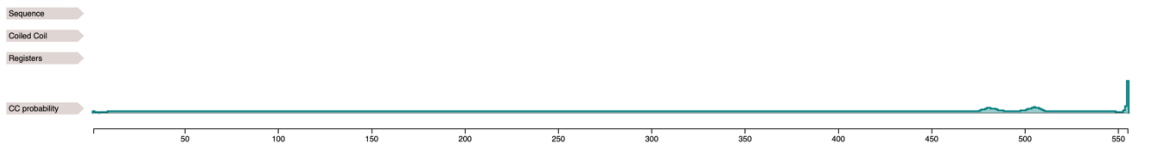

### AtREM5.1 Zoom

**Oligomerization state:**

- Parallel dimer
- Antiparallel dimer
- Trimer
- Tetramer

**Registers:**

- a b c
- d e f
- g H

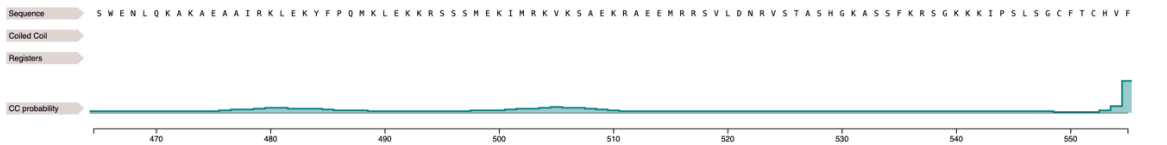

### AtREM6.1

Oligomerization state:

- Parallel dimer
- Antiparallel dimer
- Trimer
- Tetramer

Registers:

- a b c
- d e f
- g H

### AtREM6.1 Zoom

Oligomerization state:

- Parallel dimer
- Antiparallel dimer
- Trimer
- Tetramer

Registers:

- a b c
- d e f
- g H

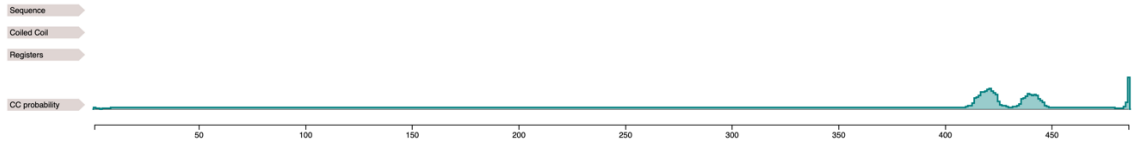

### AtREM6.2

Oligomerization state:

- Parallel dimer
- Antiparallel dimer
- Trimer
- Tetramer

Registers:

- a b c
- d e f
- g H

### AtREM 6.2 Zoom

Oligomerization state:

- Parallel dimer
- Antiparallel dimer
- Trimer
- Tetramer

Registers:

- a b c
- d e f
- g H

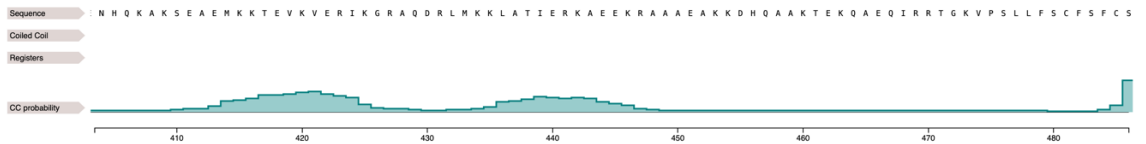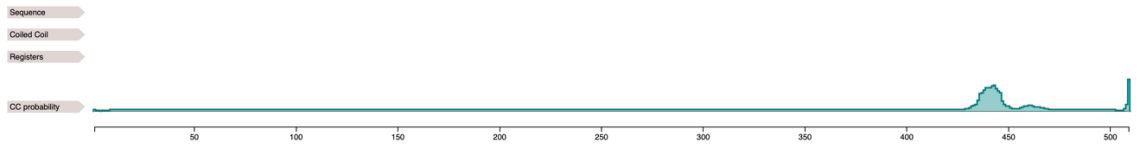

### AtREM6.3

Oligomerization state:

- Parallel dimer
- Antiparallel dimer
- Trimer
- Tetramer

Registers:

- a b c
- d e f
- g H

### AtREM6.3 Zoom

Oligomerization state:

- Parallel dimer
- Antiparallel dimer
- Trimer
- Tetramer

Registers:

- a b c
- d e f
- g H

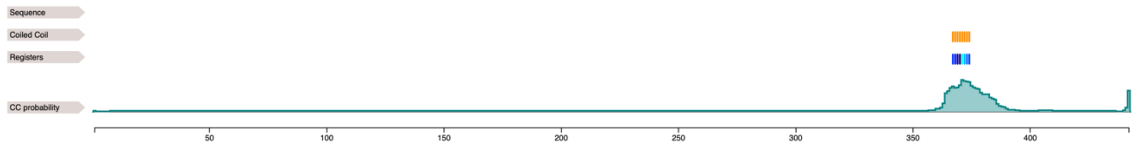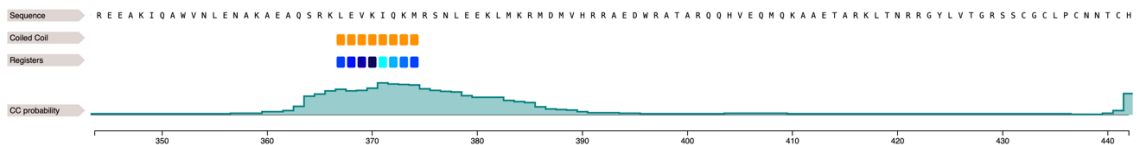

### AtREM6.4

Oligomerization state:

- Parallel dimer
- Antiparallel dimer
- Trimer
- Tetramer

Registers:

- a b c
- d e f
- g H

### AtREM6.4 Zoom

Oligomerization state:

- Parallel dimer
- Antiparallel dimer
- Trimer
- Tetramer

Registers:

- a b c
- d e f
- g H

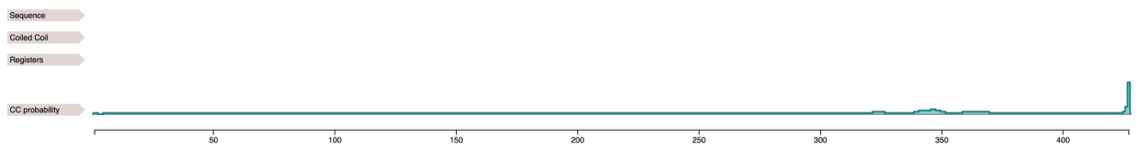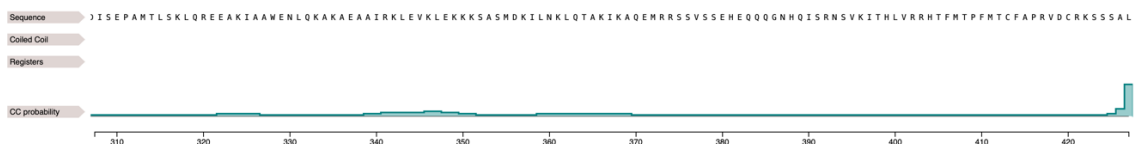

## AtREM6.5

**Oligomerization state:**  
Parallel dimer  
Antiparallel dimer  
Trimer  
Tetramer

**Registers:**  
a b c  
d e f  
g H

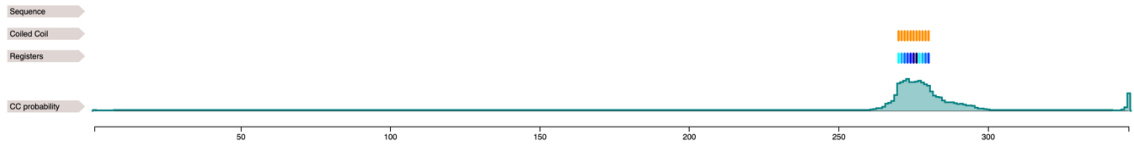

## AtREM6.5 Zoom

**Oligomerization state:**  
Parallel dimer  
Antiparallel dimer  
Trimer  
Tetramer

**Registers:**  
a b c  
d e f  
g H

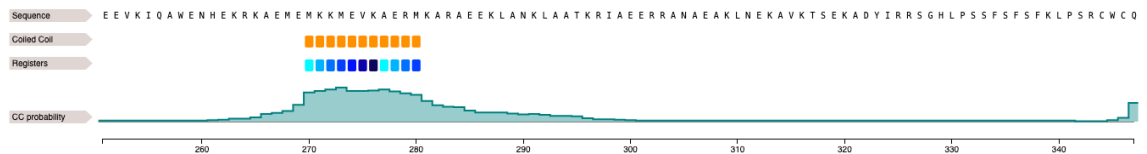

## AtREM6.6

**Oligomerization state:**  
Parallel dimer  
Antiparallel dimer  
Trimer  
Tetramer

**Registers:**  
a b c  
d e f  
g H

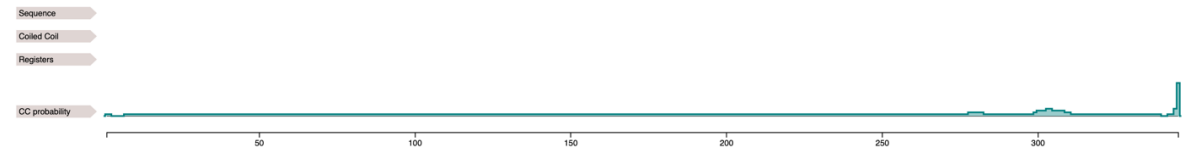

## AtREM6.6 Zoom

**Oligomerization state:**  
Parallel dimer  
Antiparallel dimer  
Trimer  
Tetramer

**Registers:**  
a b c  
d e f  
g H

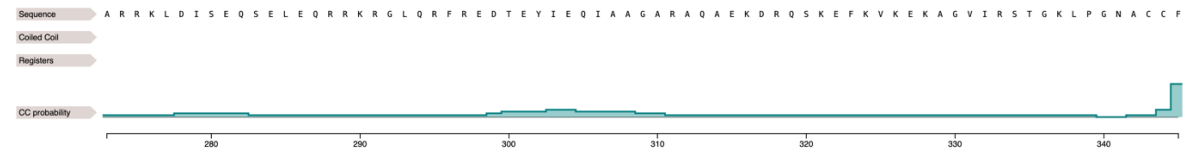

## AtREM6.7

**Oligomerization state:**  
Parallel dimer  
Antiparallel dimer  
Trimer  
Tetramer

**Registers:**  
a b c  
d e f  
g H

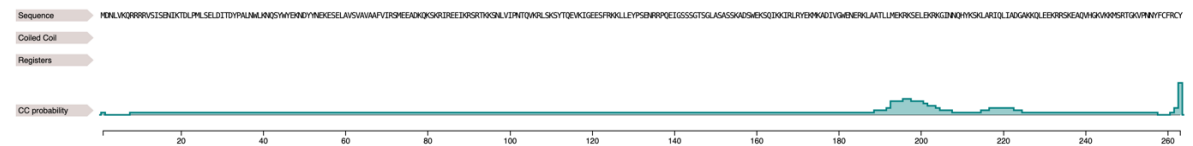

**Supplementary Data:** Coiled-coil oligomerization predicted by Coconat for the full-length REM proteins of several proteins from all REM groups (1-6). Color coding of the multimeric state and the register of the coiled-coil helical wheel is explained in the panel aside.
