# Supplementary material for: Dynamic pre-structuration of lipid nanodomain-segregating remorin proteins
Source: PubMed Central journal article supplement (PMC11621693; doi:10.1038/s42003-024-07330-y), 2024-12-05
Supplement: 42003_2024_7330_MOESM8_ESM.pdf [file 42003_2024_7330_MOESM8_ESM.pdf]

## Reporting Summary

Nature Portfolio wishes to improve the reproducibility of the work that we publish. This form provides structure for consistency and transparency in reporting. For further information on Nature Portfolio policies, see our [Editorial Policies](#) and the [Editorial Policy Checklist](#).

### Statistics

For all statistical analyses, confirm that the following items are present in the figure legend, table legend, main text, or Methods section.

n/a Confirmed

- The exact sample size ( $n$ ) for each experimental group/condition, given as a discrete number and unit of measurement
- A statement on whether measurements were taken from distinct samples or whether the same sample was measured repeatedly
- The statistical test(s) used AND whether they are one- or two-sided  
*Only common tests should be described solely by name; describe more complex techniques in the Methods section.*
- A description of all covariates tested
- A description of any assumptions or corrections, such as tests of normality and adjustment for multiple comparisons
- A full description of the statistical parameters including central tendency (e.g. means) or other basic estimates (e.g. regression coefficient) AND variation (e.g. standard deviation) or associated estimates of uncertainty (e.g. confidence intervals)
- For null hypothesis testing, the test statistic (e.g.  $F$ ,  $t$ ,  $r$ ) with confidence intervals, effect sizes, degrees of freedom and  $P$  value noted  
*Give  $P$  values as exact values whenever suitable.*
- For Bayesian analysis, information on the choice of priors and Markov chain Monte Carlo settings
- For hierarchical and complex designs, identification of the appropriate level for tests and full reporting of outcomes
- Estimates of effect sizes (e.g. Cohen's  $d$ , Pearson's  $r$ ), indicating how they were calculated

*Our web collection on [statistics for biologists](#) contains articles on many of the points above.*

### Software and code

Policy information about [availability of computer code](#)

Data collection

Bruker Topspin 4.1; MEME Suite version 5.5.2; Amber ff99sb; Amber ff14sb; GROMACS; AMOEBA; PROPKA3; Tinker HP

Data analysis

Data Availability Statement

Software and code: CcpNMR Analysis 2.5.2 for NMR data analysis; CNS for structure calculation; Aria 2.0 for structure refinement; Multicoil2 for prediction of coiled-coil structure; Fiji using the Coloc2 plug-in; R (cran.r-project.org) Prism 6.0 for statistical analysis; Simulations were analysed using tcl code (available under <https://doi.org/10.5281/zenodo.14163696>) and the VMD software.

For manuscripts utilizing custom algorithms or software that are central to the research but not yet described in published literature, software must be made available to editors and reviewers. We strongly encourage code deposition in a community repository (e.g. GitHub). See the Nature Portfolio [guidelines for submitting code & software](#) for further information.

## Data

Policy information about [availability of data](#)

All manuscripts must include a [data availability statement](#). This statement should provide the following information, where applicable:

- Accession codes, unique identifiers, or web links for publicly available datasets
- A description of any restrictions on data availability
- For clinical datasets or third party data, please ensure that the statement adheres to our [policy](#)

Chemical shifts have been deposited under the following accession codes StREM13\_160-198 BMRB ID: 52390; StREM13\_171-198 BMRB ID: 52391; StREM13\_150-198 BMRB ID: 52393; AtREM11\_156-175 BMRB ID: 52402; AtREM12\_193-212 BMRB ID: 52403; AtREM13\_171-190 BMRB ID: 52404; MtREM22\_189-208 BMRB ID: 52405; AtREM41\_277-296 BMRB ID: 52406; AtREM51\_536-555 BMRB ID: 52407; AtREM62\_490-509 BMRB ID: 52408; AtREM63\_423-442 BMRB ID: 52409; AtREM64\_408-427 BMRB ID: 52410; AtREM65\_328-347 BMRB ID: 52411. Structural ensembles have been deposited for StREM1.3171-198, StREM160-198 and StREM150-198 under the following identifiers PDB ID 9F1E, PDB ID 9F1F and PDB ID 9F1G, respectively. Primary sequences of remorins used, detailed NMR restraints have been deposited in supplementary data 1. Data used to create the Figures have been deposited in the Supplementary data 4. MD simulation data have been deposited in Zenodo under the following access: <https://doi.org/10.5281/zenodo.14163696>

## Human research participants

Policy information about [studies involving human research participants and Sex and Gender in Research](#).

|                             |                                 |
|-----------------------------|---------------------------------|
| Reporting on sex and gender | <input type="text" value="NA"/> |
| Population characteristics  | <input type="text" value="NA"/> |
| Recruitment                 | <input type="text" value="NA"/> |
| Ethics oversight            | <input type="text" value="NA"/> |

Note that full information on the approval of the study protocol must also be provided in the manuscript.

## Field-specific reporting

Please select the one below that is the best fit for your research. If you are not sure, read the appropriate sections before making your selection.

- Life sciences       Behavioural & social sciences       Ecological, evolutionary & environmental sciences

For a reference copy of the document with all sections, see [nature.com/documents/nr-reporting-summary-flat.pdf](https://www.nature.com/documents/nr-reporting-summary-flat.pdf)

## Life sciences study design

All studies must disclose on these points even when the disclosure is negative.

|                 |                                                                                                                                                                                                                             |
|-----------------|-----------------------------------------------------------------------------------------------------------------------------------------------------------------------------------------------------------------------------|
| Sample size     | <input type="text" value="Nicotiana Benthamiana leaves were aagroinfiltrated to transform cells with fluroescent tagged proteins, At least 23 cells were analyzed for each condition over the course of 3-4 experiments."/> |
| Data exclusions | <input type="text" value="no data exclusion"/>                                                                                                                                                                              |
| Replication     | <input type="text" value="All attempts of replication were successful."/>                                                                                                                                                   |
| Randomization   | <input type="text" value="no randomization"/>                                                                                                                                                                               |
| Blinding        | <input type="text" value="no blinding"/>                                                                                                                                                                                    |

## Reporting for specific materials, systems and methods

We require information from authors about some types of materials, experimental systems and methods used in many studies. Here, indicate whether each material, system or method listed is relevant to your study. If you are not sure if a list item applies to your research, read the appropriate section before selecting a response.

## Materials &amp; experimental systems

## Methods

- | n/a                                 | Involvement                                                      |
|-------------------------------------|------------------------------------------------------------------|
| <input checked="" type="checkbox"/> | <input type="checkbox"/> Antibodies                              |
| <input checked="" type="checkbox"/> | <input type="checkbox"/> Eukaryotic cell lines                   |
| <input checked="" type="checkbox"/> | <input type="checkbox"/> Palaeontology and archaeology           |
| <input checked="" type="checkbox"/> | <input type="checkbox"/> Animals and other organisms             |
| <input checked="" type="checkbox"/> | <input type="checkbox"/> Clinical data                           |
| <input type="checkbox"/>            | <input checked="" type="checkbox"/> Dual use research of concern |

- | n/a                                 | Involvement                                     |
|-------------------------------------|-------------------------------------------------|
| <input checked="" type="checkbox"/> | <input type="checkbox"/> ChIP-seq               |
| <input checked="" type="checkbox"/> | <input type="checkbox"/> Flow cytometry         |
| <input checked="" type="checkbox"/> | <input type="checkbox"/> MRI-based neuroimaging |

## Dual use research of concern

Policy information about [dual use research of concern](#)

## Hazards

Could the accidental, deliberate or reckless misuse of agents or technologies generated in the work, or the application of information presented in the manuscript, pose a threat to:

- | No                                  | Yes                                                 |
|-------------------------------------|-----------------------------------------------------|
| <input checked="" type="checkbox"/> | <input type="checkbox"/> Public health              |
| <input checked="" type="checkbox"/> | <input type="checkbox"/> National security          |
| <input checked="" type="checkbox"/> | <input type="checkbox"/> Crops and/or livestock     |
| <input checked="" type="checkbox"/> | <input type="checkbox"/> Ecosystems                 |
| <input checked="" type="checkbox"/> | <input type="checkbox"/> Any other significant area |

## Experiments of concern

Does the work involve any of these experiments of concern:

- | No                                  | Yes                                                                                                  |
|-------------------------------------|------------------------------------------------------------------------------------------------------|
| <input checked="" type="checkbox"/> | <input type="checkbox"/> Demonstrate how to render a vaccine ineffective                             |
| <input checked="" type="checkbox"/> | <input type="checkbox"/> Confer resistance to therapeutically useful antibiotics or antiviral agents |
| <input checked="" type="checkbox"/> | <input type="checkbox"/> Enhance the virulence of a pathogen or render a nonpathogen virulent        |
| <input checked="" type="checkbox"/> | <input type="checkbox"/> Increase transmissibility of a pathogen                                     |
| <input checked="" type="checkbox"/> | <input type="checkbox"/> Alter the host range of a pathogen                                          |
| <input checked="" type="checkbox"/> | <input type="checkbox"/> Enable evasion of diagnostic/detection modalities                           |
| <input checked="" type="checkbox"/> | <input type="checkbox"/> Enable the weaponization of a biological agent or toxin                     |
| <input checked="" type="checkbox"/> | <input type="checkbox"/> Any other potentially harmful combination of experiments and agents         |
